# Supplementary material
Source: MDPI journal article supplement (https://www.mdpi.com/2075-163X/11/1/94)
Supplement: s1 [file s1]

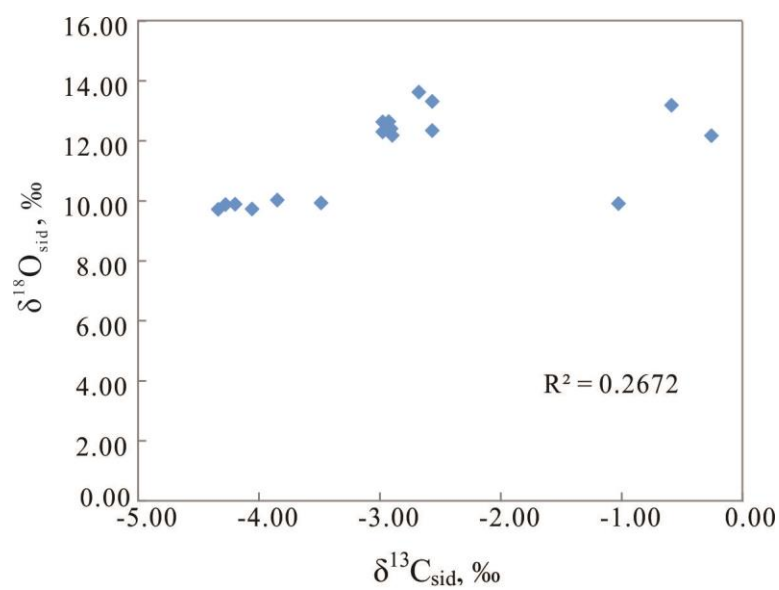

Figure S1. Correlation diagram of  $\delta^{13}\text{C}_{\text{sid}}$  and  $\delta^{18}\text{O}_{\text{sid}}$  values.

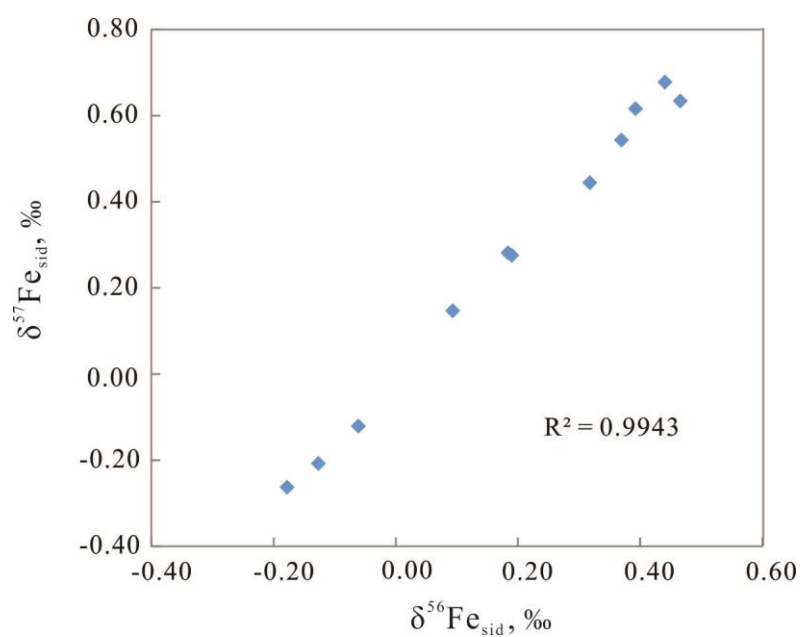

Figure S2. A plot of  $\delta^{57}\text{Fe}$ - $\delta^{56}\text{Fe}$  values showing an entirely mass-dependent ( $R^2 = 0.99$ )
